# Supplementary material for: Sterics and metal-ion radius control the self-assembly of [M2L3] helicates
Source: Royal Society of Chemistry journal article supplement (doi:10.1039/d2dt02241a), 2022-01-01
Supplement: d2dt02241a1.pdf [file d2dt02241a1.pdf]

Electronic supplementary information:

## Sterics and metal-ion radius control the self-assembly of $[M_2L_3]$ helicates

Rashid G. Siddique,<sup>a</sup> Kasun S. A. Arachchige,<sup>a</sup> Hydar A. AL-Fayaad,<sup>a</sup> John C. McMurtrie<sup>b</sup> and Jack K. Clegg<sup>a\*</sup>

### 1. Experimental

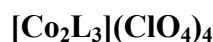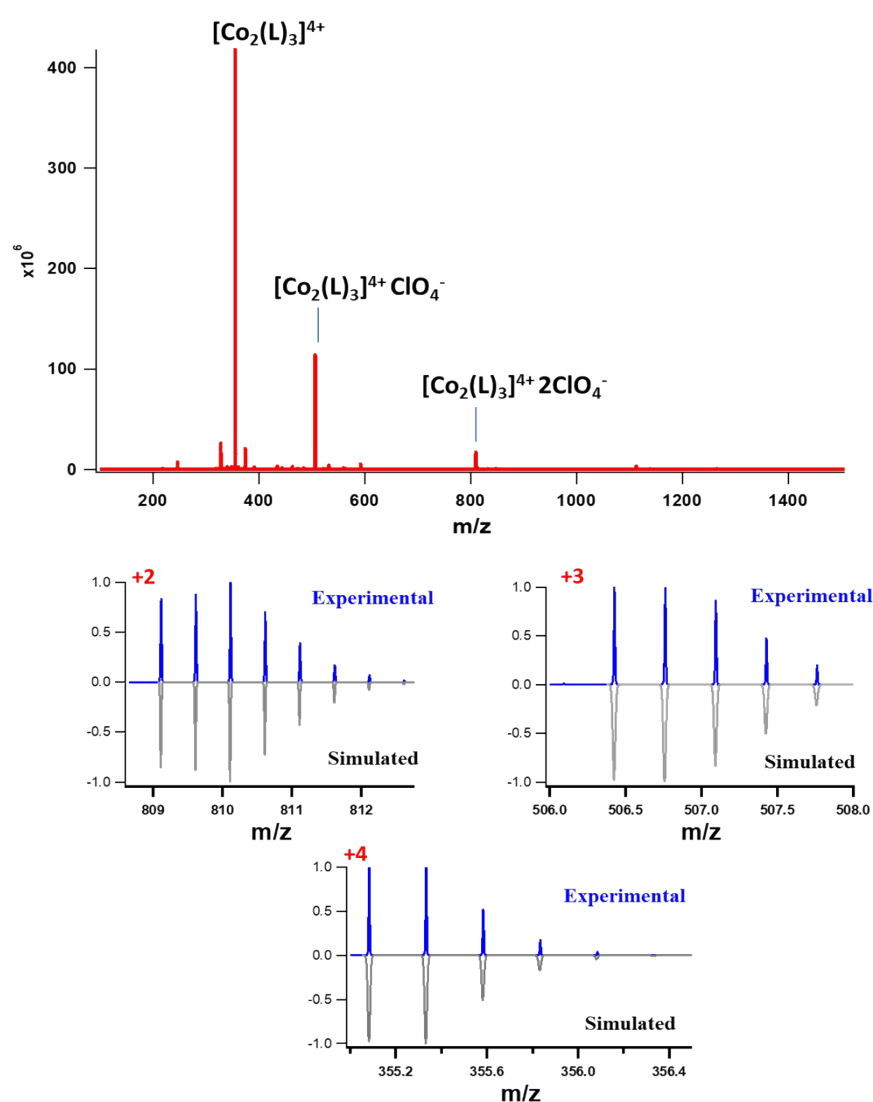

**Figure S1** ESI-MS in  $CH_3CN$  of the product shows +2, +3 and +4 ions that correspond to 2, 3 and 4 losses of  $ClO_4^-$  ions from  $[Co_2L_3]^{4+}$ .

Synthesis of  $[Co_2L_3](PF_6)_6$

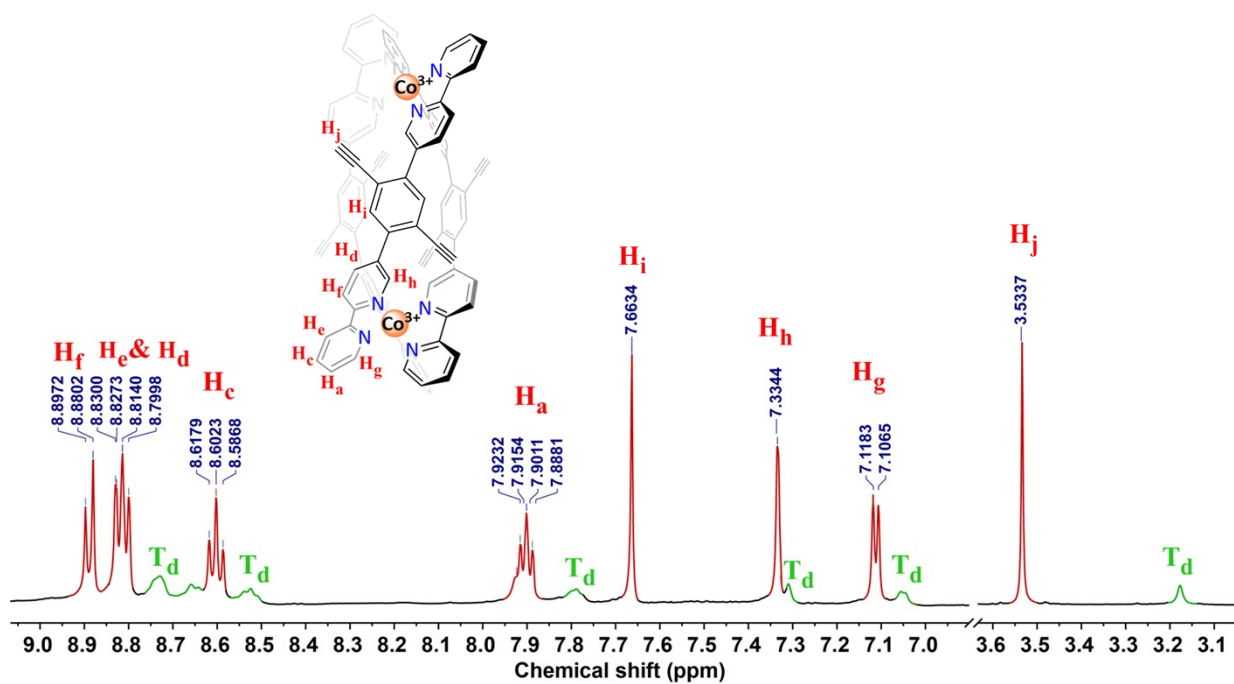

**Figure S2** The  $^1\text{H}$  NMR spectrum (500 MHz,  $\text{CD}_3\text{CN}$ , 298K) of  $\text{Co(III)} [\text{Co}_2(\text{L})_3](\text{PF}_6)_6$  with peak assignments.  $^1\text{H}$  NMR peaks of small amount of tetrahedral (Td) assembly are shown in green colour.

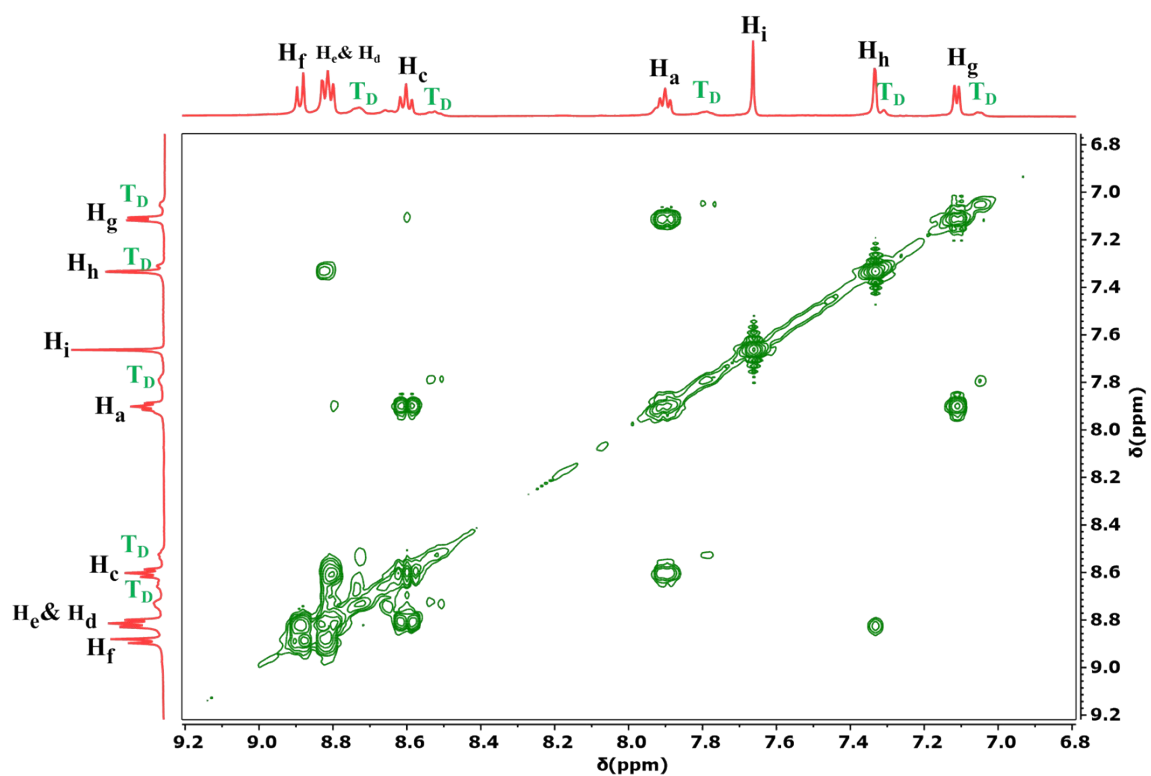

**Figure S3**  $^1\text{H}$ - $^1\text{H}$  COSY NMR (500 MHz,  $\text{CD}_3\text{CN}$ , 298K) of the Co(III) complex with ligand-L.

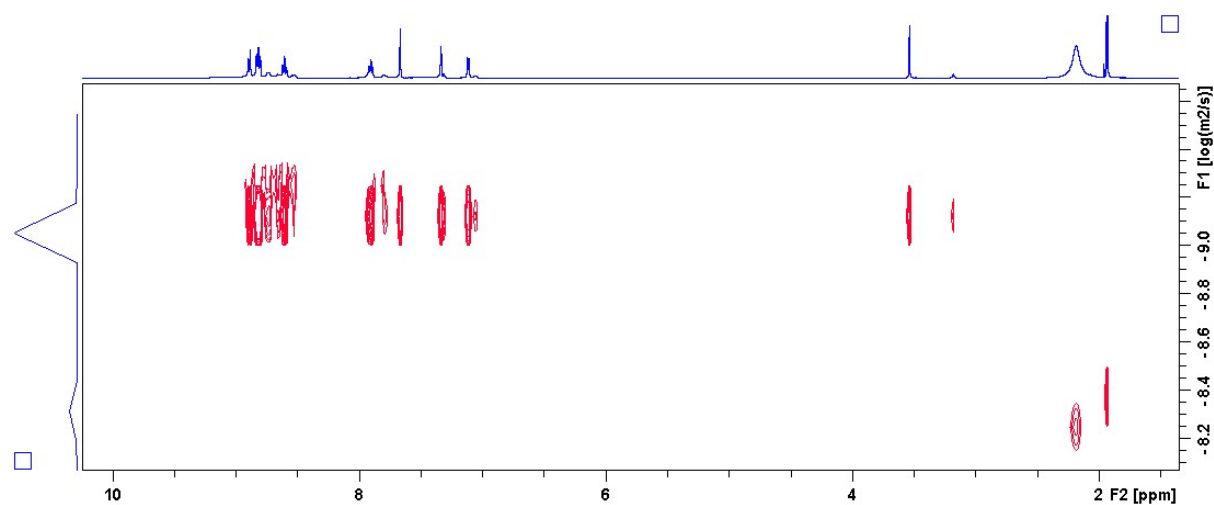

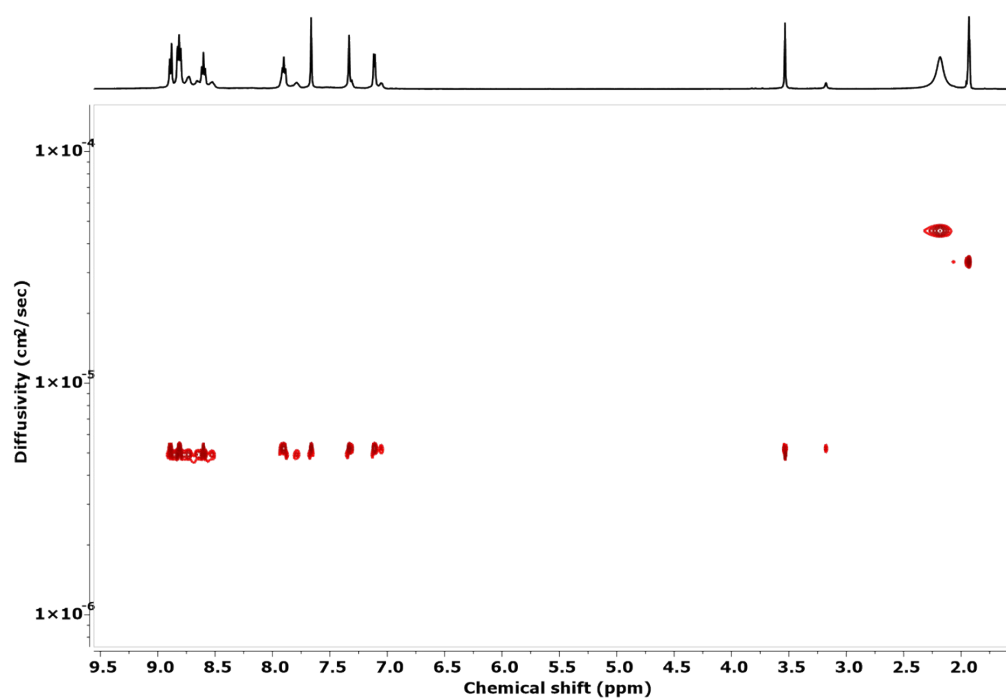

**Figure S4** <sup>1</sup>H 2D DOSY NMR (500 MHz, CD<sub>3</sub>CN, 298K) of the Co(III) complex with ligand-**L**.

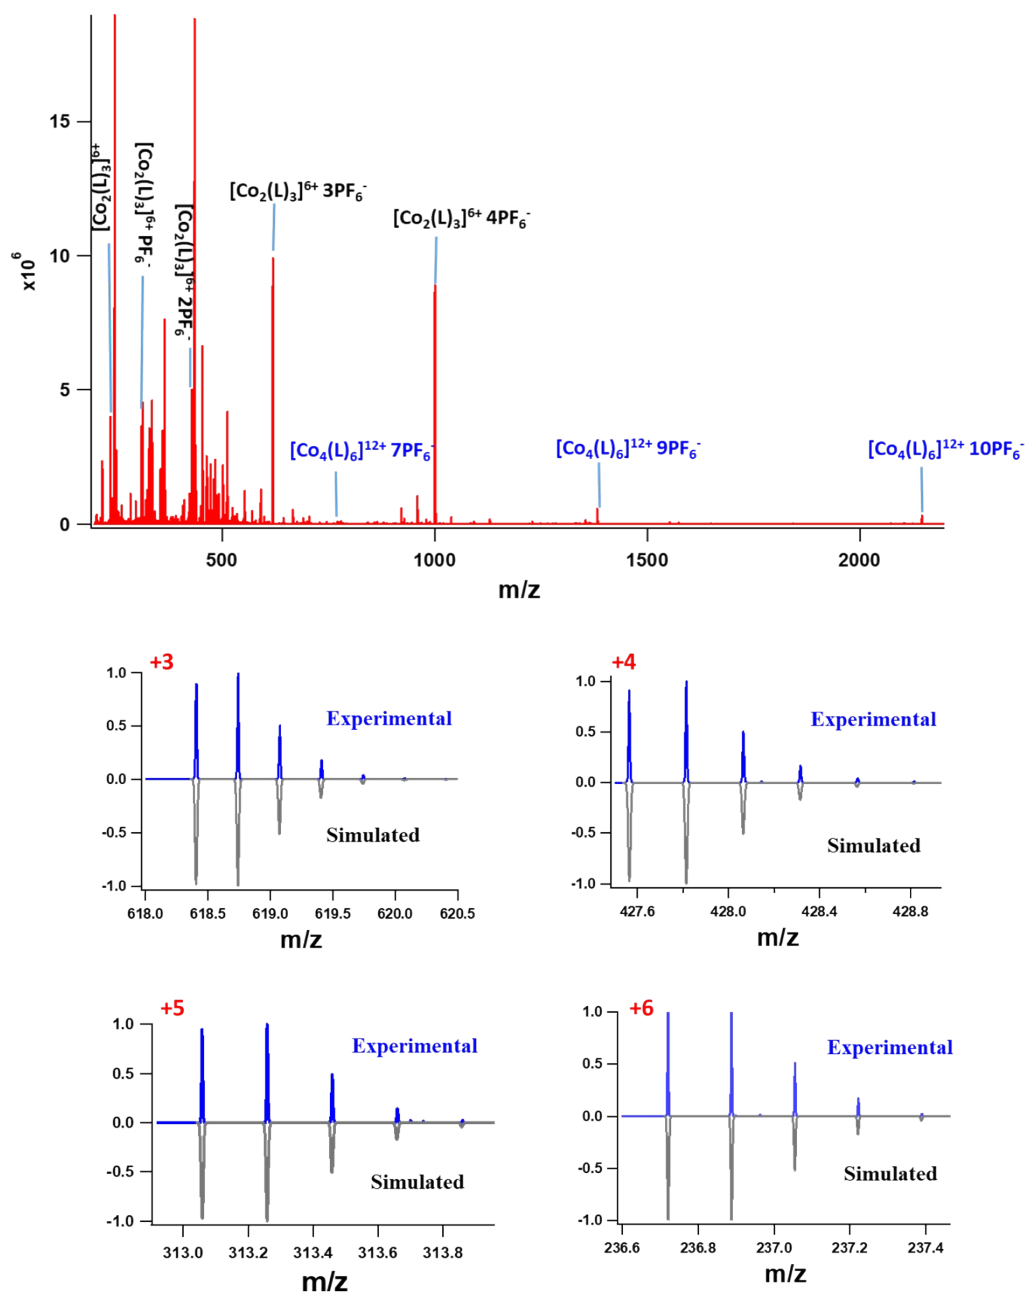

**Figure S5** ESI-MS in  $\text{CH}_3\text{CN}$  of the product shows +2, to +6 ions that correspond to successive losses of  $\text{PF}_6^-$  ions from  $[\text{Co}_2\text{L}_3]^{6+}$  and small peaks for +2 to +5 ions that corresponds to successive losses of  $\text{PF}_6^-$  ions from  $[\text{Co}_4\text{L}_6]^{12+}$ .

## Synthesis of $[\text{Zn}_2\text{L}_3](\text{ClO}_4)_4$

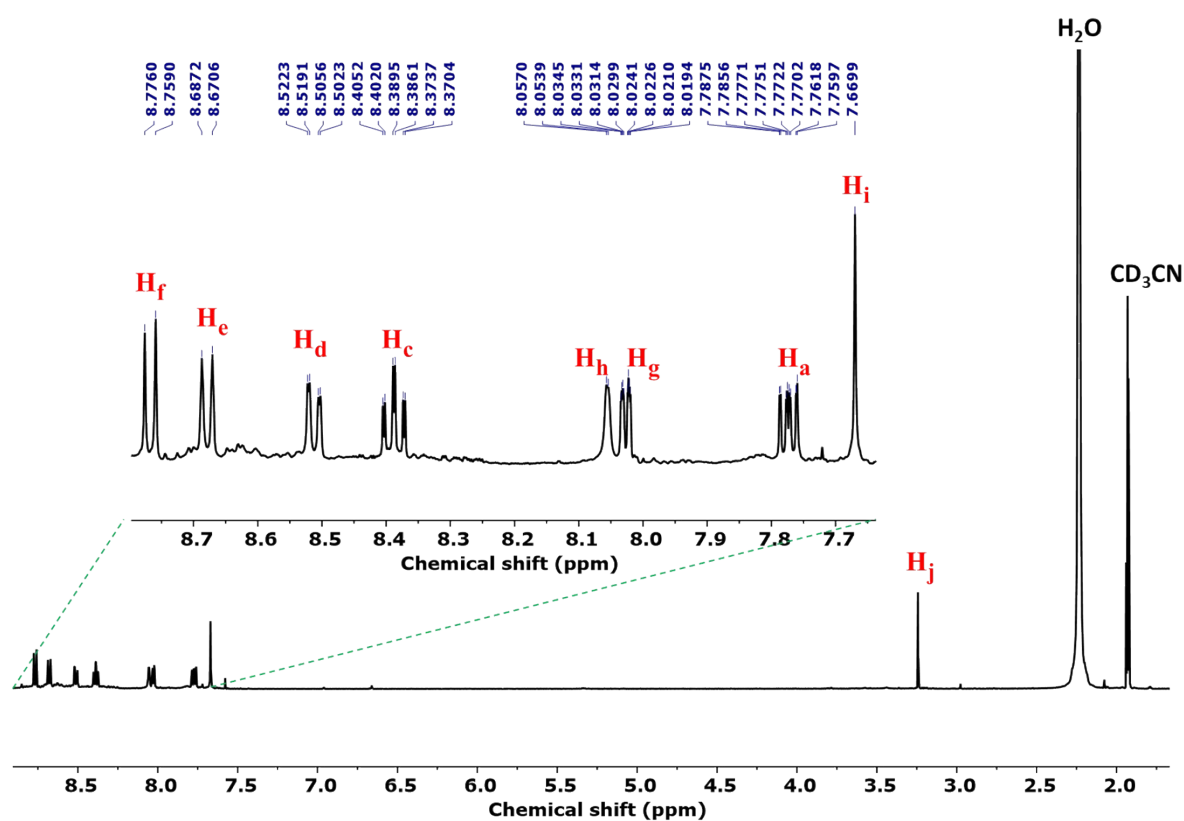

**Figure S6** The  $^1\text{H}$  NMR spectrum (500 MHz,  $\text{CD}_3\text{CN}$ , 298K) of  $\text{Zn}(\text{II})$  complex with ligand **L**.

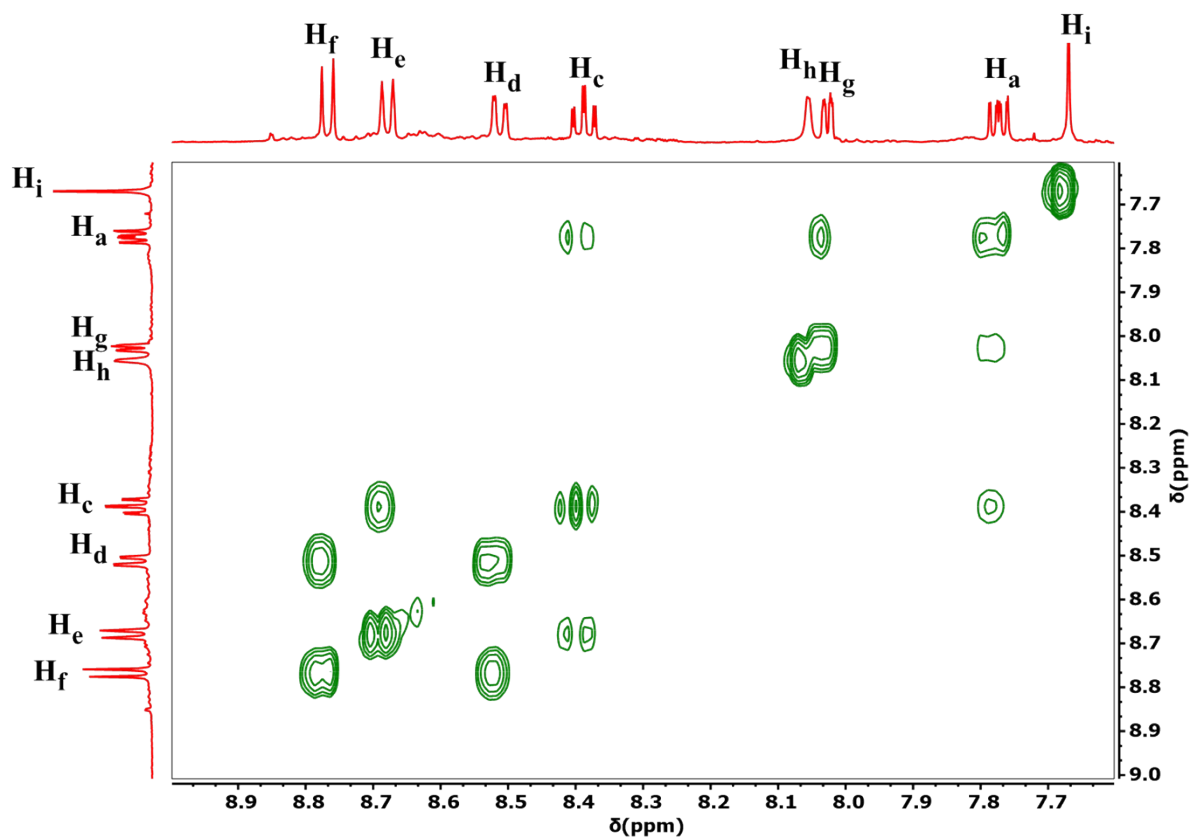

**Figure S7**  $^1\text{H}$ - $^1\text{H}$  COSY NMR (500 MHz,  $\text{CD}_3\text{CN}$ , 298K) of the Zn(II) complex with ligand-L.

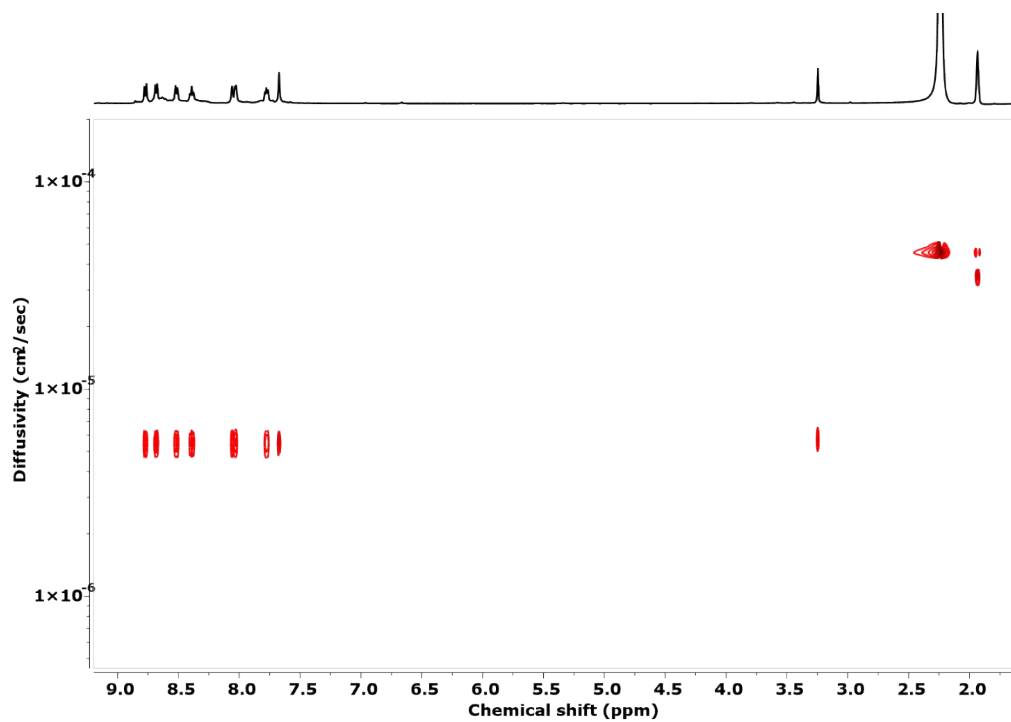

**Figure S8**  $^1\text{H}$  2D DOSY NMR (500 MHz,  $\text{CD}_3\text{CN}$ , 298K) of the Zn(II) complex with ligand-L.

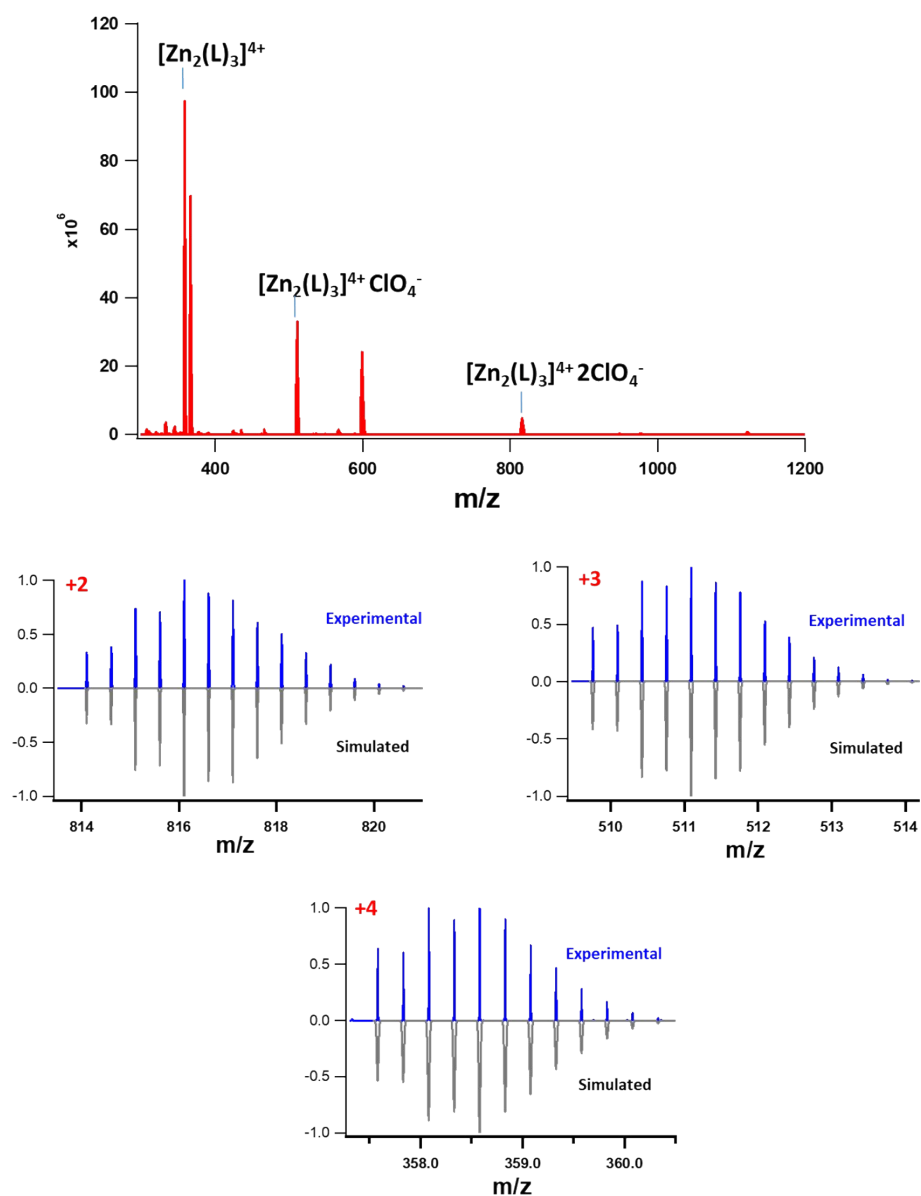

**Figure S9** ESI-MS in CH<sub>3</sub>CN of the product shows +2, +3 and +4 ions that correspond to 2, 3 and 4 losses of ClO<sub>4</sub><sup>-</sup> ions from [Zn<sub>2</sub>L<sub>3</sub>]<sup>4+</sup>.
